# Supplementary material for: Rearrangement processes and structural variations show evidence of selection in oesophageal adenocarcinomas
Source: PubMed Central journal article supplement (PMC8993906; doi:10.1038/s42003-022-03238-7), 2022-04-08
Supplement: 42003_2022_3238_MOESM2_ESM.pdf [file 42003_2022_3238_MOESM2_ESM.pdf]

## **Description of additional supplementary files**

**File name:** Supplementary Data 1

**Description:** Summary of SV signature burden and correlates

**File name:** Supplementary Data 2

**Description:** Summary of ME insertions identified by TraFic

**File name:** Supplementary Data 3

**Description:** Variables used for logistic regression analysis

**File name:** Supplementary Data 4

**Description:** Output of logistic regression of SV signatures

**File name:** Supplementary Data 5

**Description:** Summary of SV clusters, ME and Amplicon Architect intervals

**File name:** Supplementary Data 6

**Description:** List of tumours with KRAS ecDNA and number of ME clusters

**File name:** Supplementary Data 7

**Description:** Enhancer regions with no annotated genes in ecDNA amplicons

**File name:** Supplementary Data 8

**Description:** Amplicon copy number and gene expression

**File name:** Supplementary Data 9

**Description:** Two proportions z test for driver genes altered by SVs

**File name:** Supplementary Data 10

**Description:** SV driver hotspots

**File name:** Supplementary Data 11

**Description:** Breakdown of cases and SV types in SV driver genes

**File name:** Supplementary Data 12

**Description:** Non-COSMIC driver SV

**File name:** Supplementary Data 13

**Description:** RUNX1 exons and enhancers deleted in 79 patients

**File name:** Supplementary Data 14

**Description:** PCR validated SVs in RUNX1 in tumours and cell lines

**File name:** Supplementary Data 15

**Description:** PCR validation of SV events

**File name:** Supplementary Data 16

**Description:** RS Regression covariates with hold out
